# Supplementary material for: Profiling of tumour-associated microbiota in human hepatocellular carcinoma
Source: PubMed Central journal article supplement (PMC8134445; doi:10.1038/s41598-021-89963-1), 2021-05-19
Supplement: 41598_2021_89963_MOESM1_ESM.pdf [file 41598_2021_89963_MOESM1_ESM.pdf]

## **Supplementary Information**

Profiling of tumour-associated microbiota in human hepatocellular carcinoma

Seiga Komiyama, Takahiro Yamada, Nobuyuki Takemura, Norihiro Kokudo,  
Koji Hase, Yuki I. Kawamura

- Supplemental Figures S1-S3

# Supplementary Figure S1

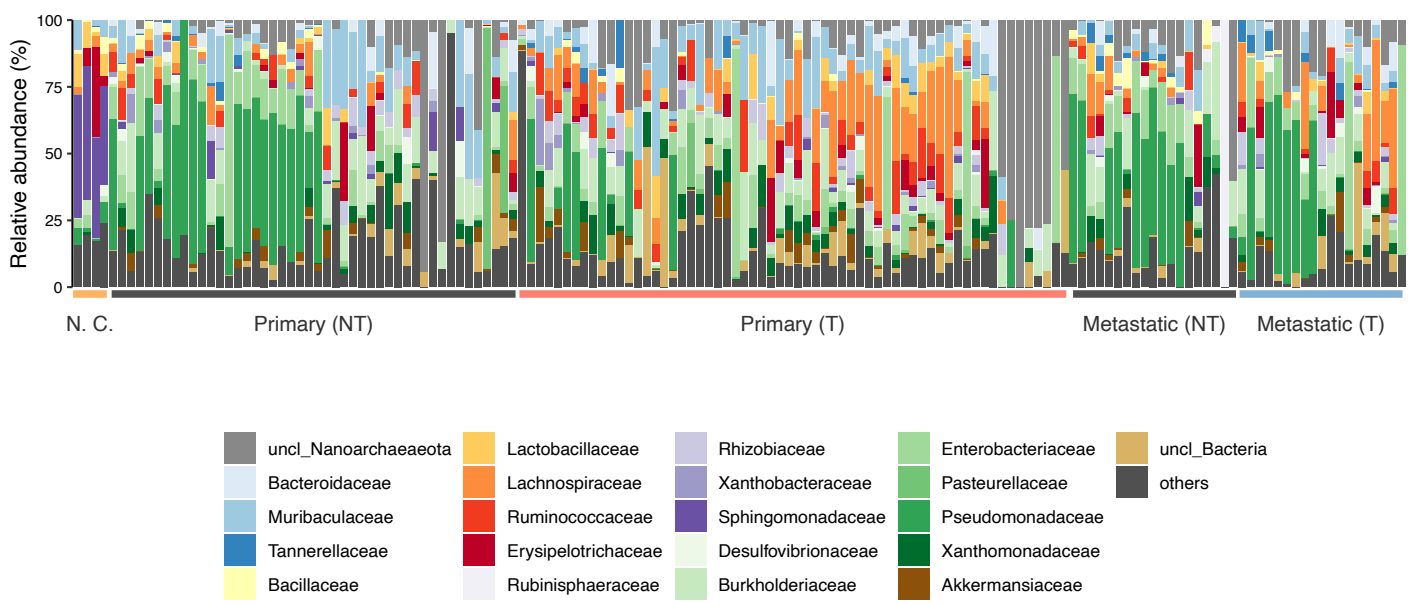

**Supplementary Fig. S1. The microbial composition of the tumour and non-tumour regions of primary or metastatic liver cancers.**

The microbial composition of the negative controls (N. C.), and the tumour (T) and non-tumour (NT) regions of primary or metastatic liver cancers.

# Supplementary Figure S2

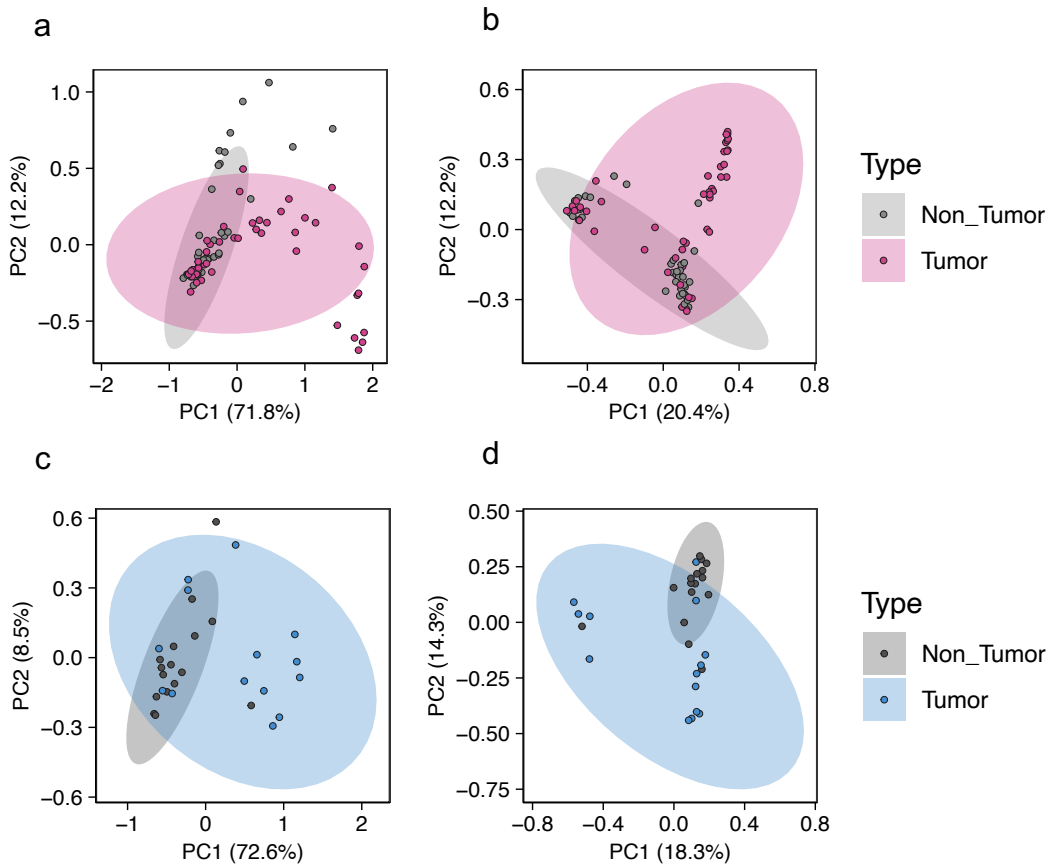

**Supplementary Fig. S2. The beta diversity of the microbiota in the tumor and non-tumor regions of primary or metastatic liver cancers.**

(a-d) Principal component analysis of weighted UniFrac distances (a, c) or Bray-Curtis distances (b, d) among the microbiota in the non-tumor and tumor regions of primary (a, b) or metastatic liver cancers (c, d).

# Supplementary Figure S3

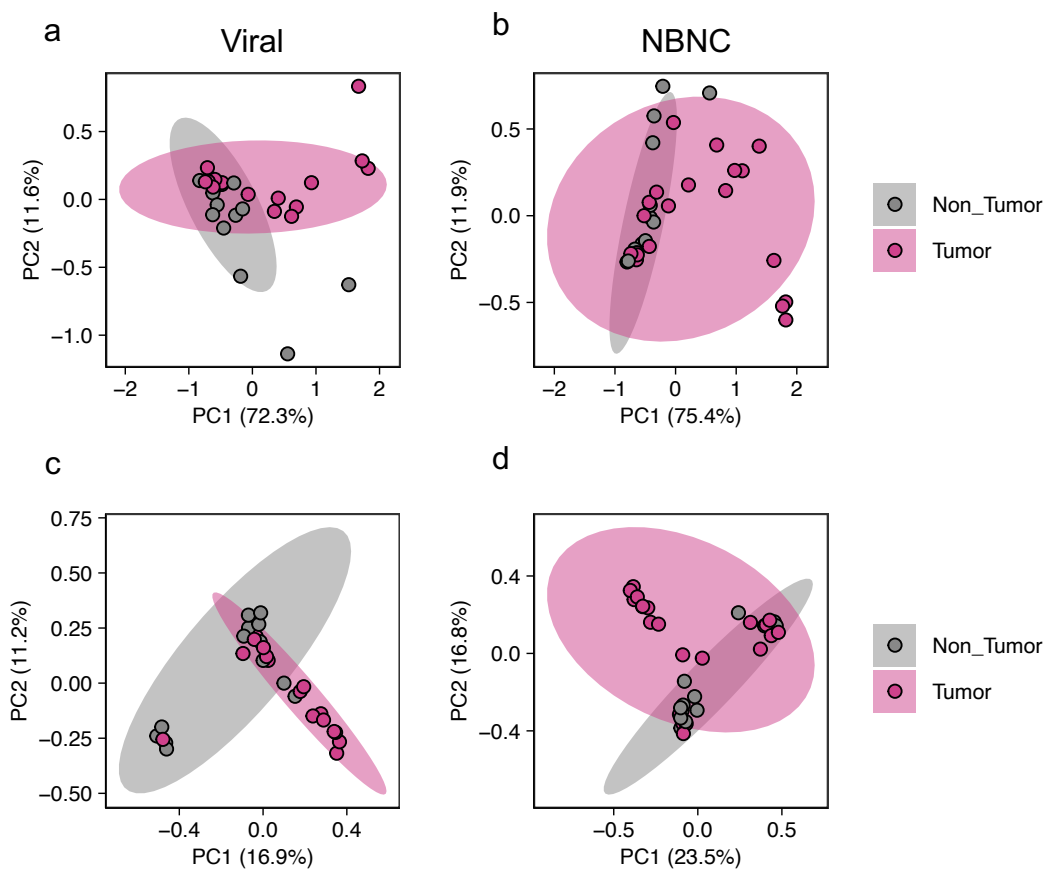

**Supplementary Fig. S3. The beta diversity of the microbiota in the tumor and non-tumor tissues of viral or NBNC HCC.**

(a-d) Principal component analysis of weighted UniFrac distances (a, b) or Bray-Curtis distances (c, d) among the microbiota in the non-tumor and tumor regions of viral (a, c) or NBNC HCC (b, d).
